# Supplementary material for: Polymer fiber membrane-based direct ethanol fuel cell with Ni-doped SnO2 promoted Pd/C catalyst
Source: Royal Society of Chemistry journal article supplement (doi:10.1039/d0cy00477d), 2020-01-01
Supplement: d0cy00477d1.pdf [file d0cy00477d1.pdf]

*Electronic Supplementary Information*

**Polymer fiber membrane-based direct ethanol fuel cell with Ni-doped  
SnO<sub>2</sub> promoted Pd/C catalyst**

**Ting Qu,<sup>a</sup> Qiang Tan,<sup>\*a</sup> Liting Liu,<sup>b</sup> Shengwu Guo,<sup>a</sup> Sai Li<sup>\*c</sup> and Yongning Liu<sup>\*a</sup>**

<sup>a</sup> State Key Laboratory for Mechanical Behavior of Materials, School of Material Science and Engineering, Xi'an Jiaotong University, Xi'an, 710049, China

<sup>b</sup> Analytical and Testing Center, Northwestern Polytechnical University, Xi'an, 710072, China

<sup>c</sup> School of Chemistry and Chemical Engineering, Xi'an University of Science and Technology, Xi'an, 710054, China

\* Corresponding Authors: qiangtan@xjtu.edu.cn (Q. Tan); saili@xust.edu.cn (S. Li); ynliu@xjtu.edu.cn (Y. Liu)

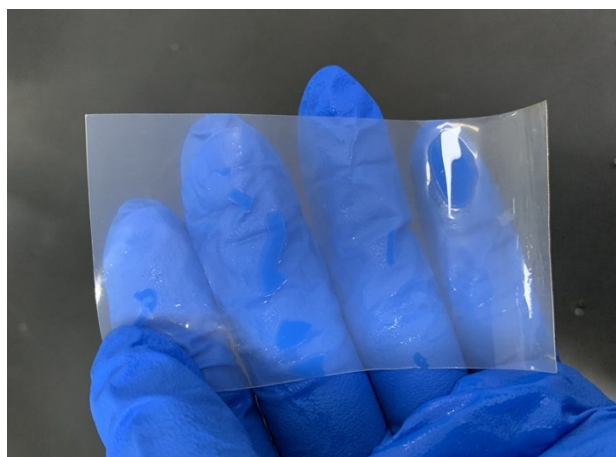

**Fig. S1.** The image of the 'hm-e17270' anion-exchange membrane.

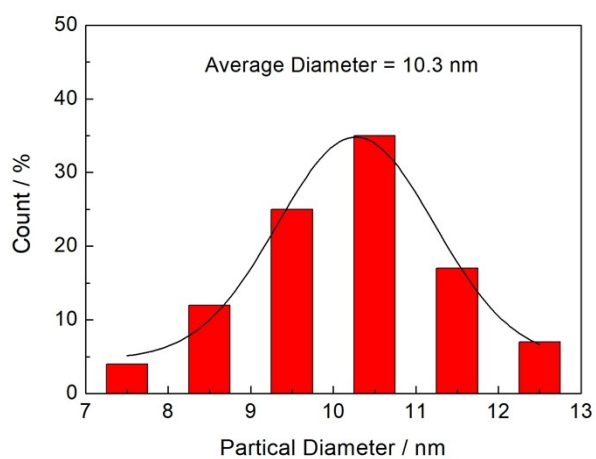

**Fig. S2.** Size histogram of SnO<sub>2</sub> nanoparticles (average diameter: 10.3 nm).

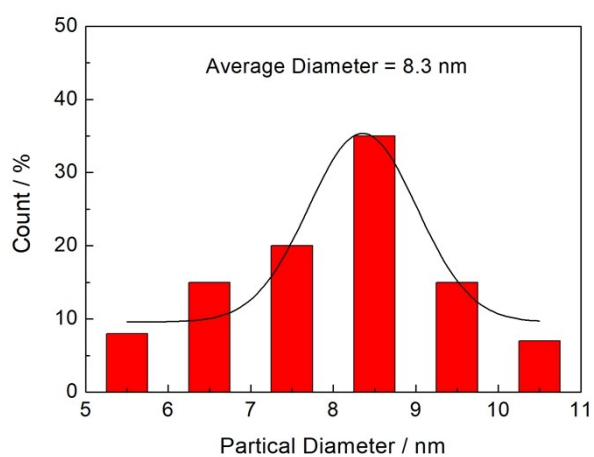

**Fig. S3.** Size histogram of Ni-doped SnO<sub>2</sub> nanoparticles (average diameter: 8.3 nm).

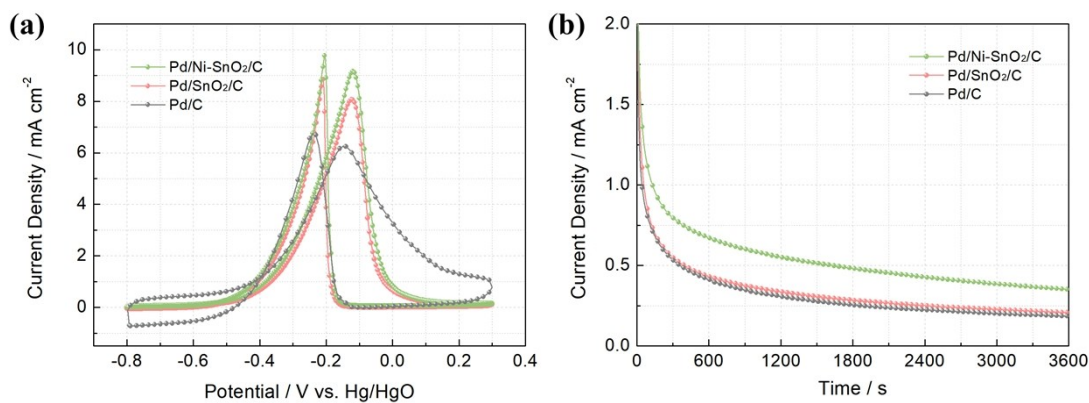

**Fig. S4.** (a) CV and (b) CA curves of Pd/C, Pd/SnO<sub>2</sub>/C and Pd/Ni-SnO<sub>2</sub>/C catalysts in 1.0 M KOH and 1.0 M EtOH mixed solution (-0.8 to 0.3 V vs Hg/HgO, sweep rate 50 mV s<sup>-1</sup>).

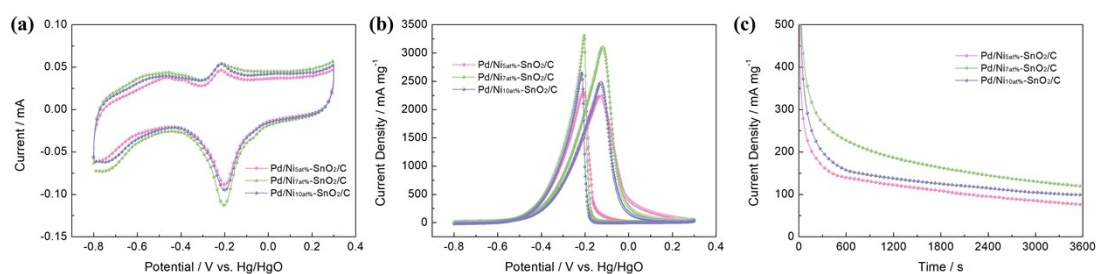

**Fig. S5.** (a) CV curves of Pd/Ni<sub>5at%</sub>-SnO<sub>2</sub>/C, Pd/Ni<sub>7at%</sub>-SnO<sub>2</sub>/C and Pd/Ni<sub>10at%</sub>-SnO<sub>2</sub>/C catalysts in 1.0 M KOH solution. (b) CV and (c) CA curves of Pd/Ni<sub>5at%</sub>-SnO<sub>2</sub>/C, Pd/Ni<sub>7at%</sub>-SnO<sub>2</sub>/C and Pd/Ni<sub>10at%</sub>-SnO<sub>2</sub>/C catalysts in 1.0 M KOH and 1.0 M EtOH mixed solution (-0.8 to 0.3 V vs Hg/HgO, sweep rate 50 mV s<sup>-1</sup>).

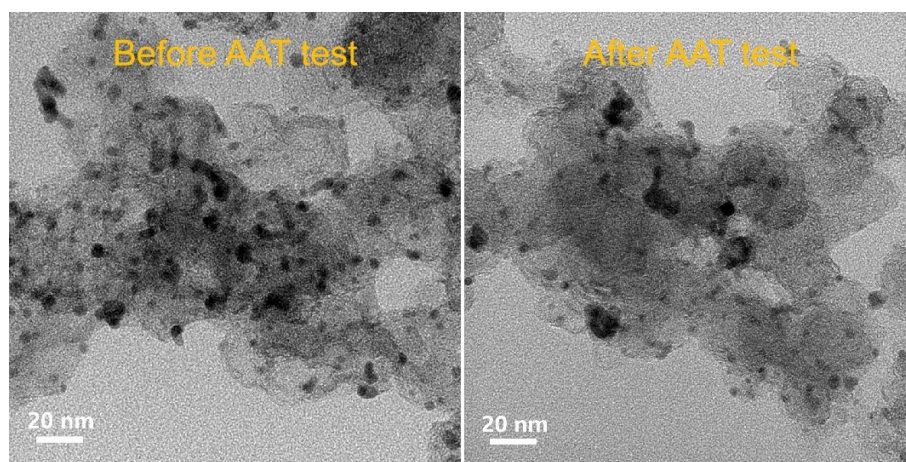

**Fig. S6.** A TEM image of Pd/Ni-SnO<sub>2</sub>/C catalyst before and after the AAT test.

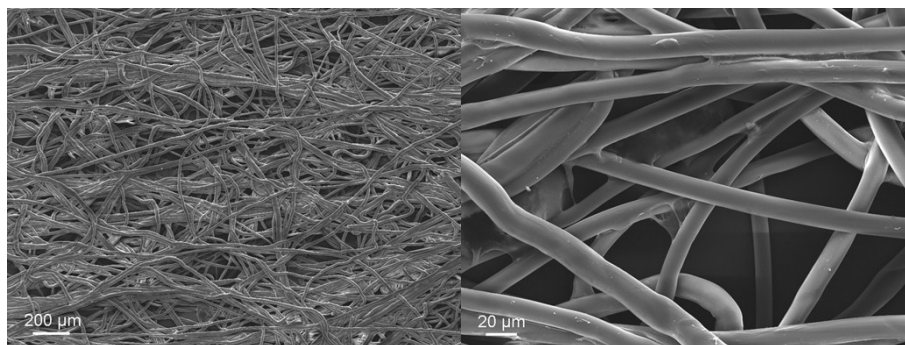

**Fig. S7.** SEM images of polymer fiber membrane.

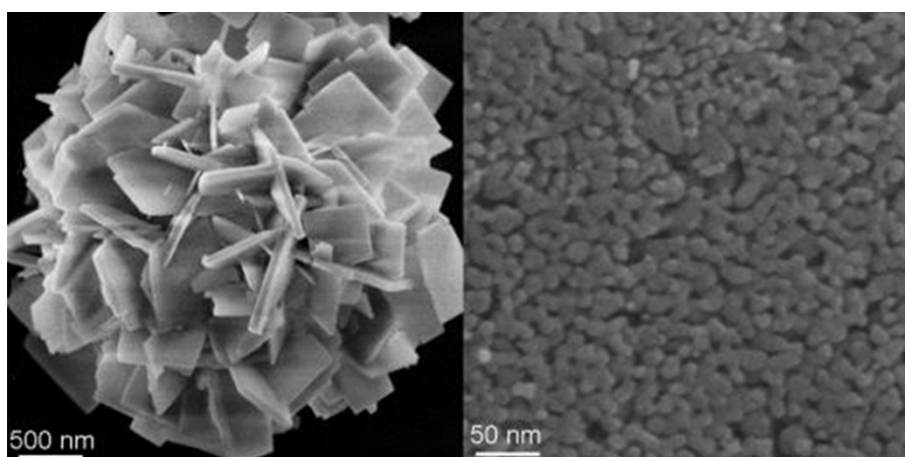

**Fig. S8.** SEM images of porous  $\text{NiCo}_2\text{O}_4$  catalyst.

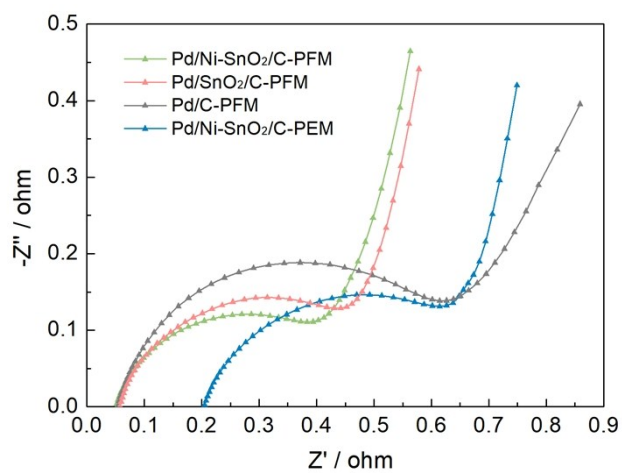

**Fig. S9.** Nyquist plots of the DEFCs with the Pd/C, Pd/SnO<sub>2</sub>/C and Pd/Ni-SnO<sub>2</sub>/C anode catalysts at 30 °C.

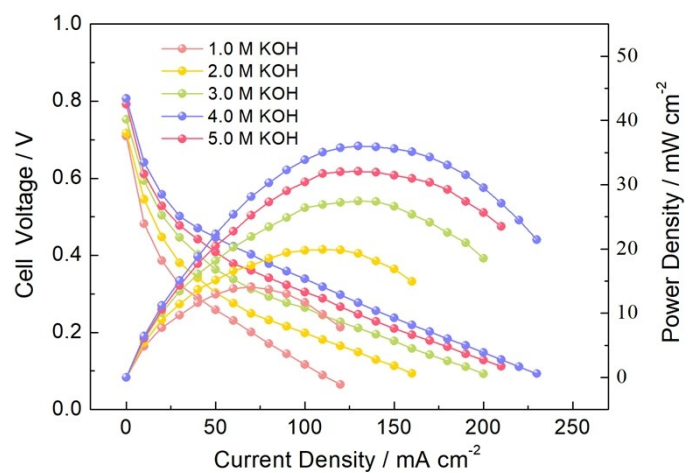

**Fig. S10.** Polarization and power density curves of PFM-based DEFC with Pd/Ni-SnO<sub>2</sub>/C (anode) and NiCo<sub>2</sub>O<sub>4</sub> (cathode) catalysts in a 1.0 M EtOH solution containing different KOH concentrations.

**Table S1.** Physical properties of PFM

| Physical property                  | Value |
|------------------------------------|-------|
| Thickness ( $\mu\text{m}$ )        | 159.3 |
| Basis Weight ( $\text{g m}^{-2}$ ) | 61.5  |
| Air Resistance (sec 100 ml)        | 4.51  |
| Electrolyte Holding Ratio (%)      | 195   |
| S Content (%)                      | 0.70  |

The information is provided by Nippon Kodoshi Corporation.

**Table S2.** Physical properties of PEM

| Physical property                                                            | Value      |
|------------------------------------------------------------------------------|------------|
| Thickness ( $\mu\text{m}$ )                                                  | 200        |
| Membrane area resistance ( $\Omega \text{ cm}^{-2}$ )                        | $\leq 2.2$ |
| Water transmissivity ( $\text{mL h}^{-1} \text{ cm}^{-2} \text{ MPa}^{-1}$ ) | $\leq 0.1$ |

The information is provided by Huamotech Corporation.

**Table S3.** The summary of the particle size characterization (XRD, TEM)

|                   | $\beta$ (101) | $\theta$ (101) | Crystallite size (nm)<br>from XRD | Particle size (nm)<br>from TEM |
|-------------------|---------------|----------------|-----------------------------------|--------------------------------|
| $\text{SnO}_2$    | 0.716         | 33.856         | 11.6                              | 10.3                           |
| $\text{Ni-SnO}_2$ | 0.912         | 34.086         | 9.0                               | 8.3                            |

**Table S4.** Comparison of DEFCs performance in alkaline media

| Anode (catalyst loading / $\text{mg cm}^{-2}$ )     | Cathode (catalyst loading / $\text{mg cm}^{-2}$ ) | Solution | Electrolyte   | Temperature ( $^{\circ}\text{C}$ ) | Power density ( $\text{mW cm}^{-2}$ ) | Refs.     |
|-----------------------------------------------------|---------------------------------------------------|----------|---------------|------------------------------------|---------------------------------------|-----------|
| Pd/C ( $1_{\text{Pd}}$ )                            | $\text{NiCo}_2\text{O}_4$ (20)                    | KOH      | PFM           | 30                                 | 10.5                                  | This work |
| Pd/ $\text{SnO}_2$ /C ( $1_{\text{Pd}}$ )           |                                                   |          |               |                                    | 17.9                                  |           |
| Pd/Ni- $\text{SnO}_2$ /C ( $1_{\text{Pd}}$ )        |                                                   |          |               |                                    | 47.4                                  |           |
| $\text{Ni}_{32}\text{Pd}_{34}\text{Pt}_{37}$ /C (1) | Pt/C ( $1_{\text{Pt}}$ )                          | NaOH     | Tokuyama A006 | 40                                 | 41                                    | 1         |
| $\text{Pd}_1\text{Nb}_1$ /C ( $1_{\text{Pd}}$ )     | Pt/C ( $1_{\text{Pt}}$ )                          | KOH      | Nafion 117    | 70                                 | 18.11                                 | 2         |
| PdNi/EGO ( $1_{\text{Pd}}$ )                        | Pt/C (1)                                          | NaOH     | Tokuyama AS4  | 50                                 | 16.6                                  | 3         |
| Pd/C (2.56)                                         | (Bg-CA-M)-Fe/N/C (2.56)                           | KOH      | Tokuyama A201 | 90                                 | 64                                    | 4         |
| PdNiSn/ $\text{C}_\text{F}$ (1)                     | Pt/C (1)                                          | NaOH     | Nafion 117    | 100                                | 38.8                                  | 5         |
| Pd/C ( $6_{\text{Pd}}$ )                            | FeCo (2)                                          | KOH      | Tokuyama A201 | room temperature                   | 32                                    | 6         |

## Supplementary References

1. A. Dutta, R. Adhikary, P. Broekmann and J. Datta, *Appl. Catal. B-Environ.*, 2019, **257**, 117847.
2. F. M. Souza, J. Nandenha, B. L. Batista, V. H. A. Oliveira, V. S. Pinheiro, L. S. Parreira, A. O. Neto and M. C. Santos, *Int. J. Hydrog. Energy*, 2018, **43**, 4505-4516.
3. J. L. Tan, A. M. De Jesus, S. L. Chua, J. Sanetuntikul, S. Shanmugam, B. J. V. Tongol and H. Kim, *Appl. Catal. A-Gen.*, 2017, **531**, 29-35.
4. M. Rauf, R. Chen, Q. Wang, Y.-C. Wang and Z.-Y. Zhou, *Carbon*, 2017, **125**, 605-613.
5. L. P. R. Moraes, B. R. Matos, C. Radtke, E. I. Santiago, F. C. Fonseca, S. C. Amico and C. F. Malfatti, *Int. J. Hydrog. Energy*, 2016, **41**, 6457-6468.
6. H. A. Miller, L. Wang, M. Bellini, J. Filippi, A. Marchionni, M. G. Folliero, A. Lavacchi, M. V. Pagliaro and F. Vizza, *Energy Technol.*, 2016, **4**, 1119-1124.
